# Supplementary material for: Highly Efficient Blood Protein Analysis Using Membrane Purification Technique and Super-Hydrophobic SERS Platform for Precise Screening and Staging of Nasopharyngeal Carcinoma
Source: Nanomaterials (Basel). 2022 Aug 8;12(15):2724. doi: 10.3390/nano12152724 (PMC9370769; doi:10.3390/nano12152724)
Supplement: Supplementary file 1 [file nanomaterials-12-02724-s001.zip › nanomaterials-1793384-supplementary.pdf]

## supplementary materials

# Highly Efficient Blood Protein Analysis Using Membrane Purification Technique and Super-Hydrophobic SERS Platform for Precise Screening and Staging of Nasopharyngeal Carcinoma

Jinyong Lin <sup>1,2,†</sup>, Youliang Weng <sup>2,†</sup>, Xueliang Lin <sup>3,†</sup>, Sufang Qiu <sup>2</sup>, Zufang Huang <sup>1</sup>, Changbin Pan <sup>1</sup>, Ying Li <sup>2</sup>, Kien Voon Kong <sup>4</sup>, Xianzeng Zhang <sup>1,\*</sup> and Shangyuan Feng <sup>1,\*</sup>

<sup>1</sup> Key Laboratory of OptoElectronic Science and Technology for Medicine, Ministry of Education, Fujian Provincial Key Laboratory for Photonics Technology, Fujian Normal University, Fuzhou 350007, China

<sup>2</sup> Clinical Oncology School of Fujian Medical University, Fujian Cancer Hospital, Fuzhou 350014, China

<sup>3</sup> Fujian Provincial Key Laboratory for Advanced Micro-Nano Photonics Technology and Devices, Research Center for Photonics Technology, Quanzhou Normal University, Quanzhou 362046, China

<sup>4</sup> Department of Chemistry, National Taiwan University, Taipei 10617, Taiwan

\* Correspondence: xzzhang@fjnu.edu.cn (X.Z.); syfeng@fjnu.edu.cn (S.F.)

† These authors contributed equally to this work.

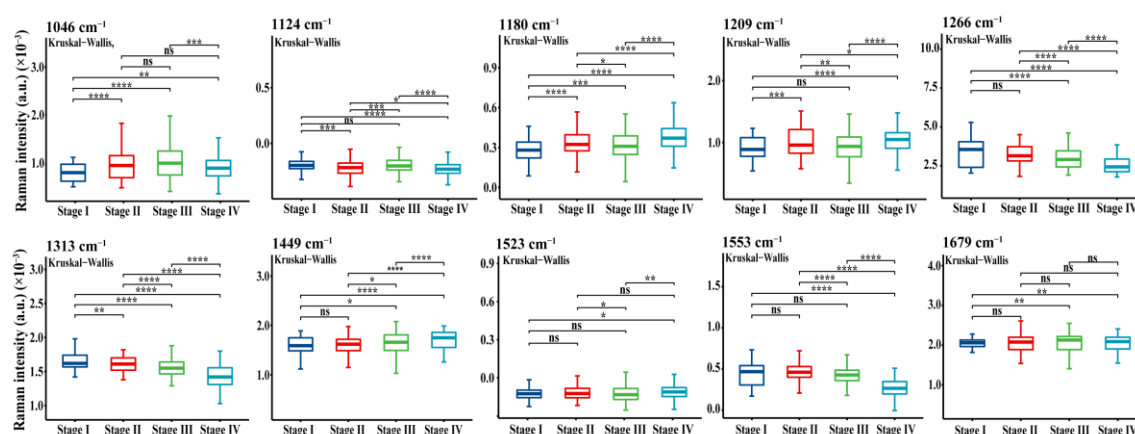

**Figure S1** Box plots of others of the protein SERS peak intensities for NPC subjects at each of the four stages. Abbreviations: ns indicates no significance; \* $p < 0.05$ ; \*\* $p < 0.01$ ; \*\*\* $p < 0.001$ ; \*\*\*\* $p < 0.0001$  (Kruskal–Wallis test).
